# Supplementary material for: The simultaneous quantitative detection of multiple hormones based on PS-MS: affinity capture by a single antibody
Source: Royal Society of Chemistry journal article supplement (doi:10.1039/d2an00029f), 2022-01-01
Supplement: d2an00029f1.pdf [file d2an00029f1.pdf]

## ***Supporting Information***

### **Simultaneously quantitative detection of multiple hormones based on PS-MS: affinity capture by single antibody**

Tianhao Wu, Mingying Ma, Gongwei Sun, Sichun Zhang\*, Xinrong Zhang.

Department of Chemistry, Tsinghua University, Beijing, 100084, China).

*\*Corresponding Author*

\*Prof. Sichun Zhang, Department of Chemistry, Tsinghua University, Beijing, 100084, P. R. China.

E-mail: [sichun@mail.tsinghua.edu.cn](mailto:sichun@mail.tsinghua.edu.cn)

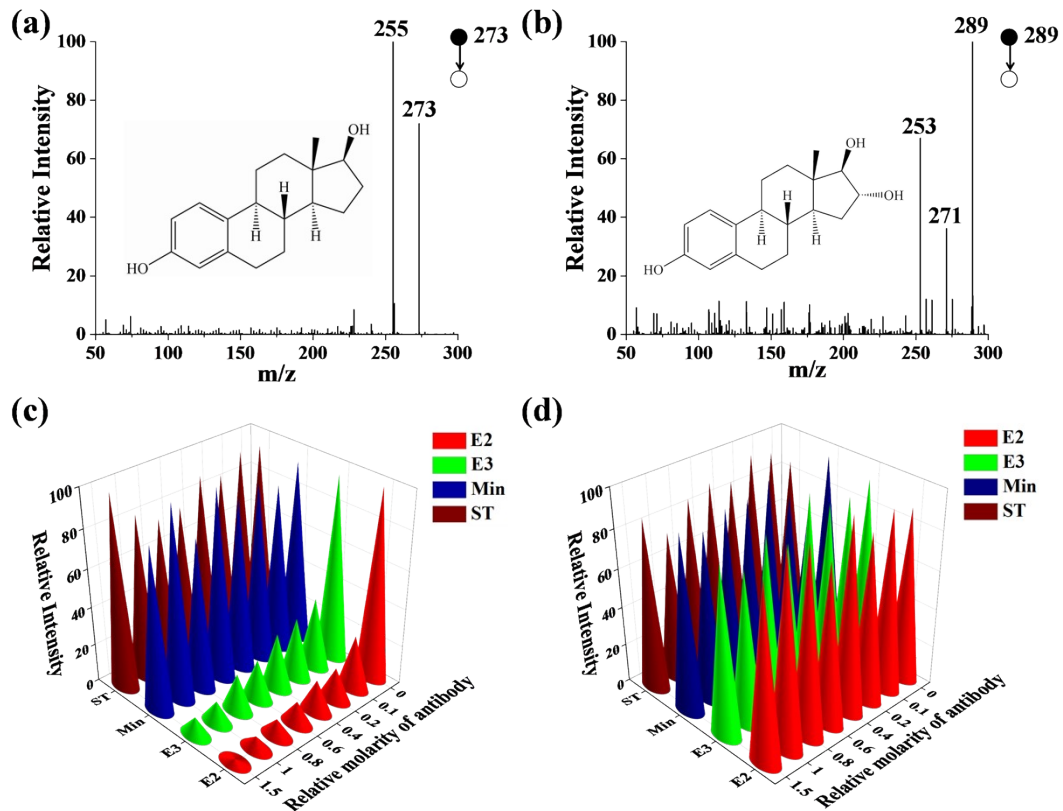

**Figure S1.** (a)-(b) MS/MS spectra of two hormones in standard samples: (a) estradiol (E2), (b) estriol (E3); (c)-(d) relative intensity (ratio to the highest one in different groups) of different hormones: (a)  $1.0 \mu\text{g L}^{-1}$  each hormone mixed with different molar concentration of E2 antibody, (b) paralleled samples to (a) just added with 5% (v/v) formic acid.

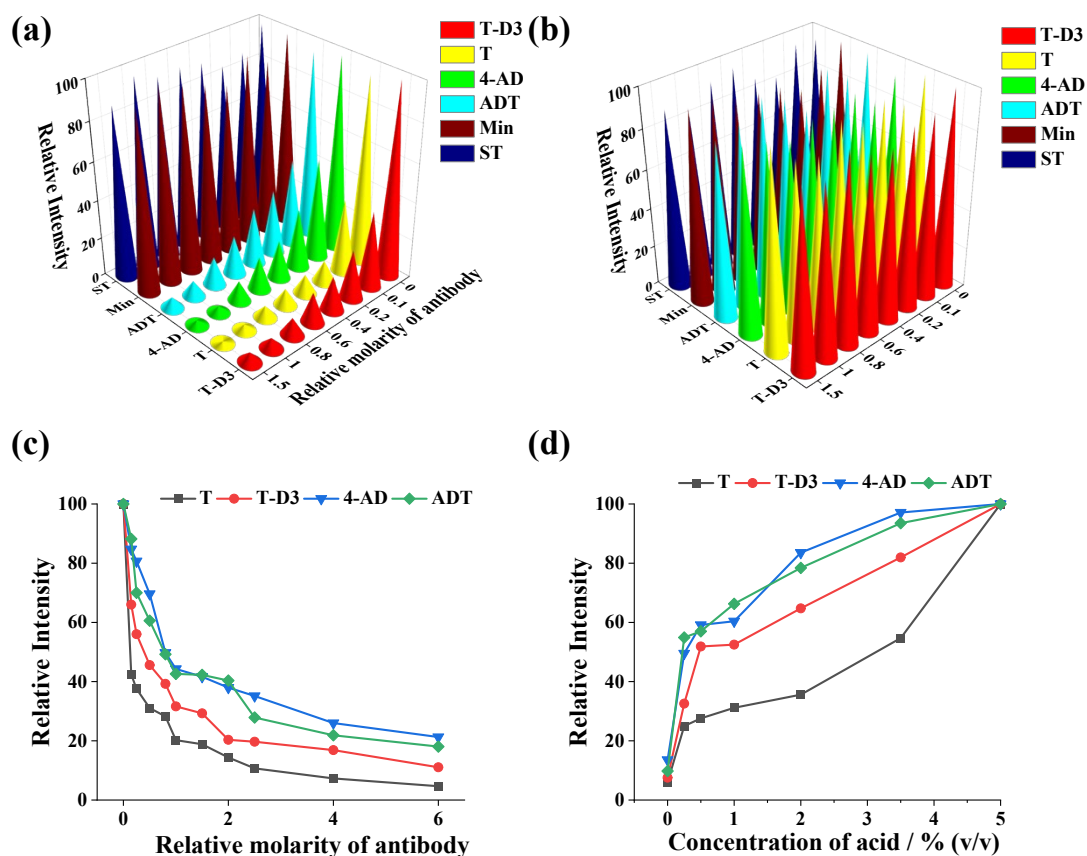

**Figure S2.** (a)-(b) Relative intensity (ratio to the highest one in different groups) of different hormones: (a)  $1.0 \mu\text{g L}^{-1}$  each hormones respectively mixed with different molar concentration of T antibody from another company, (b) paralleled samples to (a) just added with 5% (v/v) formic acid, (c) relative intensity (ratio to the highest one in different groups) of four mixed hormones ( $1.0 \mu\text{g L}^{-1}$  for each) with different molar concentration of T antibody, (d) relative intensity (ratio to the highest one in different groups) of four mixed hormones ( $1.0 \mu\text{g L}^{-1}$  for each) with  $2.0 \times 10^{-8} \text{ mol L}^{-1}$  T antibody

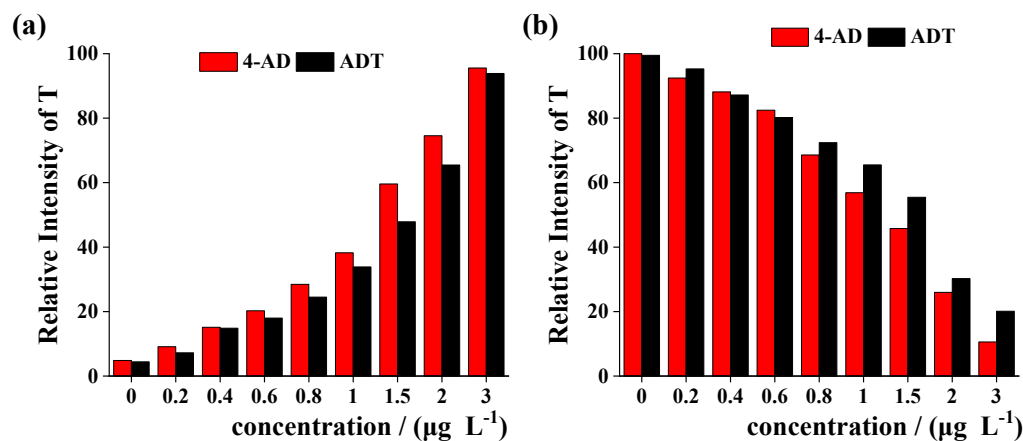

**Figure S3.** Relative intensity of T (a) dissociative section; (b) captured section. ( $1 \mu\text{g L}^{-1}$  T,  $5.0 \times 10^{-8} \text{ mol L}^{-1}$  T antibody mixed with different concentration of 4-AD or ADT respectively)

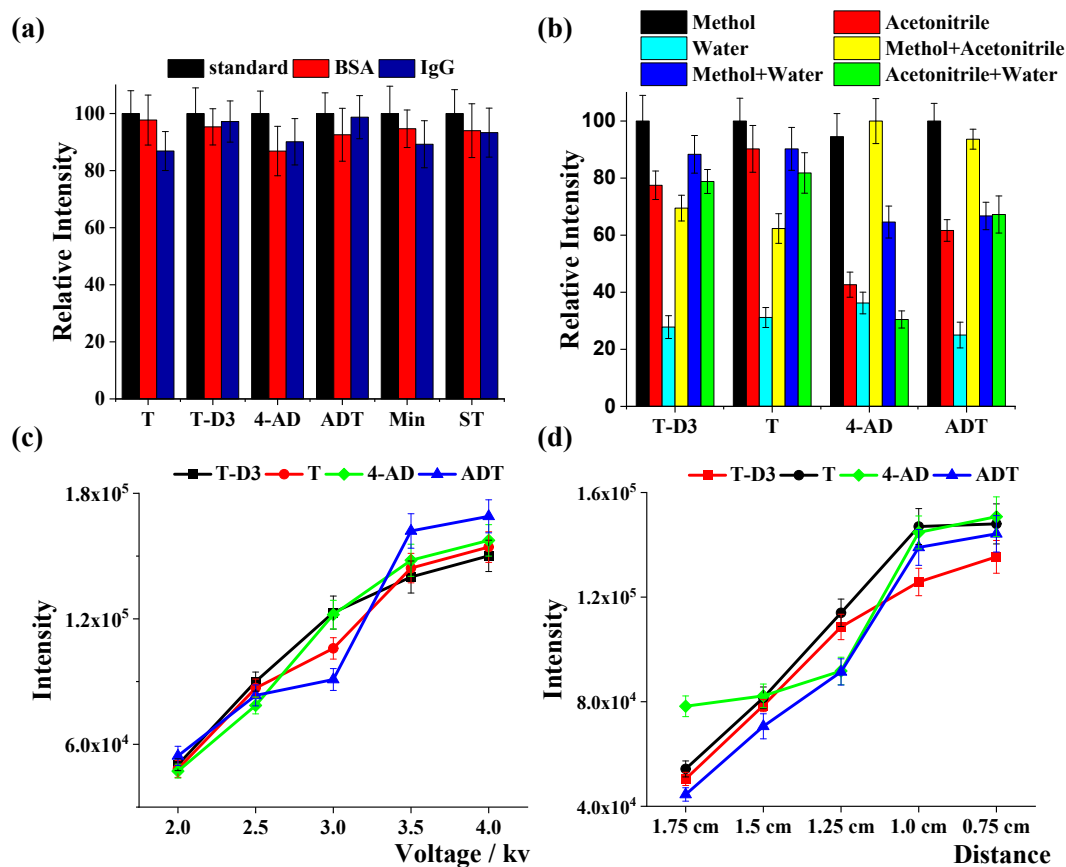

**Figure S4.** (a) Relative intensity (ratio to the highest one in different groups) of six hormones ( $1.0 \mu\text{g L}^{-1}$  for each) respectively mixed with  $2.0 \times 10^{-8} \text{ mol L}^{-1}$  BSA and IgG compared with standard samples, (b)-(d) optimization results of PS-MS (the concentration of samples was all kept to  $1 \mu\text{g L}^{-1}$ ): (a) spray solvent, (c) ionization voltage, (d) the distance between paper and MS inlet.

**Table S1.** Calculated results of recovery in spiked serum to direct paper spray.

| <i>compound</i>                   | <i>Paper spray</i><br>( $\mu\text{g/L}$ ) | <i>Affinity process</i><br>( $\mu\text{g/L}$ ) | <i>Recovery/%</i> |
|-----------------------------------|-------------------------------------------|------------------------------------------------|-------------------|
| <i>Testosterone</i>               | $0.04 \pm 0.005$                          | $0.04 \pm 0.004$                               | 90.9              |
|                                   | $0.16 \pm 0.007$                          | $0.16 \pm 0.008$                               | 98.8              |
|                                   | $0.61 \pm 0.022$                          | $0.58 \pm 0.033$                               | 95.1              |
|                                   | $1.49 \pm 0.060$                          | $1.54 \pm 0.078$                               | 103.4             |
| <i>Androsterone</i>               | $0.04 \pm 0.004$                          | $0.04 \pm 0.003$                               | 107.5             |
|                                   | $0.16 \pm 0.010$                          | $0.15 \pm 0.010$                               | 93.8              |
|                                   | $0.58 \pm 0.028$                          | $0.61 \pm 0.025$                               | 105.2             |
|                                   | $1.47 \pm 0.069$                          | $1.45 \pm 0.087$                               | 98.6              |
| <i>Androstenedion</i><br><i>e</i> | $0.04 \pm 0.005$                          | $0.04 \pm 0.004$                               | 95.2              |
|                                   | $0.16 \pm 0.008$                          | $0.15 \pm 0.009$                               | 96.8              |
|                                   | $0.64 \pm 0.024$                          | $0.62 \pm 0.030$                               | 96.9              |
|                                   | $1.50 \pm 0.071$                          | $1.55 \pm 0.090$                               | 103.3             |
